# Supplementary material for: Identification of a third myosin-5a-melanophilin interaction that mediates the association of myosin-5a with melanosomes
Source: eLife journal article supplement (doi:10.7554/elife.93662), 2024-01-19
Supplement: fig3-data1 [file elife Figure 3A data.xlsx]

## Sheet: Export
NanoTemper Technologies	NanoTemper Technologies
MO.Affinity Analysis v2.3	MO.Affinity Analysis v2.3
Origin of exported data	Origin of exported data
Project Title:
Comment:
Project File Path:	C:\Users\PJB\Desktop\MST\cc cc-g-2.nta
Analysis-Set Name:	Analysis-Set #1
Exported from:	Compare Results (Chart)
Exported on:	2024-02-03 19:55:15
Sample Information	Sample Information			Sample Information	Sample Information
Merge-Set Name:	Myo5a-MTD			Merge-Set Name:	Myo5a-MTDΔG
Capillary Type:	Monolith NT.115 Capillary			Capillary Type:	Monolith NT.115 Capillary
Target:	MyTarget			Target:	MyTarget
TargetConcentration:	2e-08			TargetConcentration:	2e-08
Ligand:	MyLigand			Ligand:	MyLigand
Measurement Settings	Measurement Settings			Measurement Settings	Measurement Settings
MST-Power:	Medium			MST-Power:	Medium
Excitation-Power:	20			Excitation-Power:	20
Excitation type:	Nano - BLUE			Excitation type:	Nano - BLUE
Thermostat Setpoint:	(disabled)			Thermostat Setpoint:	(disabled)
Analysis Settings	Analysis Settings			Analysis Settings	Analysis Settings
Type of Analysis:	MST			Type of Analysis:	MST
Evaluation strategy:	On Time			Evaluation strategy:	On Time
Cold Region Start:	-1			Cold Region Start:	-1
Cold Region End:	0			Cold Region End:	0
Hot Region Start:	4			Hot Region Start:	4
Hot Region End:	5			Hot Region End:	5
Fit Results (Kd)	Fit Results (Kd)			Fit Results (Kd)	Fit Results (Kd)
Fit Model:	Kd			Fit Model:	Kd
Bound	945.598			Bound	952.745
Unbound	953.709			Unbound	954.694
Kd	5.61267e-07			Kd	2.96002e-07
TargetConc	00:00:00.002000			TargetConc	00:00:00.002000
Standard Deviation:	0.771546			Standard Deviation:	0.505408
Kd Confidence:	1.69099e-07			Kd Confidence:	2.37435e-07
Dose Response Curve	Dose Response Curve	Dose Response Curve		Dose Response Curve	Dose Response Curve	Dose Response Curve
Dose	Response	Err-Values		Dose	Response	Err-Values
7.62939e-10	952.708	0.402656		7.62939e-10	954.752	0.138858
1.52588e-09	953.372	0.512832		1.52588e-09	954.595	1.95069
3.05176e-09	952.795	0.472711		3.05176e-09	954.753	1.32477
6.10352e-09	953.255	1.33037		6.10352e-09	954.618	1.63288
1.2207e-08	952.115	0.490827		1.2207e-08	954.943	2.23104
2.44141e-08	952.77	1.23069		2.44141e-08	954.136	1.12341
4.88281e-08	952.863	0.602163		4.88281e-08	954.059	1.82034
9.76563e-08	951.575	0.457193		9.76563e-08	954.8	0.30751
1.95313e-07	950.983	0.803022		1.95313e-07	954.008	1.54027
3.90625e-07	949.119	0.362144		3.90625e-07	953.376	0.460611
7.8125e-07	948.519	0.384609		7.8125e-07	953.48	1.27499
1.5625e-06	947.609	0.464533		1.5625e-06	953.123	1.22334
3.125e-06	946.653	0.416878		3.125e-06	951.703	0.560594
6.25e-06	946.464	0.336266		6.25e-06	953.792	1.13478
1.25e-05	945.306	0.600456		1.25e-05	953.002	1.73355
2.5e-05	944.282	1.19758		2.5e-05	952.589	0.629865

## Sheet: Fit-Values
Dose	Myo5a-MTD	FNorm		Dose	Myo5a-MTDΔG	FNorm
2.33258e-05	945.789	945.789		2.33258e-05	952.77	952.77
2.17638e-05	945.802	945.802		2.17638e-05	952.772	952.772
2.03063e-05	945.816	945.816		2.03063e-05	952.773	952.773
1.89465e-05	945.831	945.831		1.89465e-05	952.775	952.775
1.76777e-05	945.848	945.848		1.76777e-05	952.778	952.778
1.64938e-05	945.865	945.865		1.64938e-05	952.78	952.78
1.53893e-05	945.884	945.884		1.53893e-05	952.782	952.782
1.43587e-05	945.903	945.903		1.43587e-05	952.785	952.785
1.33972e-05	945.924	945.924		1.33972e-05	952.788	952.788
1.25e-05	945.947	945.947		1.25e-05	952.791	952.791
1.16629e-05	945.971	945.971		1.16629e-05	952.794	952.794
1.08819e-05	945.996	945.996		1.08819e-05	952.797	952.797
1.01532e-05	946.023	946.023		1.01532e-05	952.801	952.801
9.47323e-06	946.052	946.052		9.47323e-06	952.805	952.805
8.83883e-06	946.083	946.083		8.83883e-06	952.809	952.809
8.24692e-06	946.116	946.116		8.24692e-06	952.813	952.813
7.69465e-06	946.15	946.15		7.69465e-06	952.818	952.818
7.17936e-06	946.187	946.187		7.17936e-06	952.823	952.823
6.69858e-06	946.227	946.227		6.69858e-06	952.828	952.828
6.25e-06	946.268	946.268		6.25e-06	952.834	952.834
5.83146e-06	946.312	946.312		5.83146e-06	952.84	952.84
5.44094e-06	946.359	946.359		5.44094e-06	952.846	952.846
5.07658e-06	946.408	946.408		5.07658e-06	952.853	952.853
4.73661e-06	946.46	946.46		4.73661e-06	952.86	952.86
4.41942e-06	946.515	946.515		4.41942e-06	952.868	952.868
4.12346e-06	946.573	946.573		4.12346e-06	952.876	952.876
3.84733e-06	946.635	946.635		3.84733e-06	952.885	952.885
3.58968e-06	946.699	946.699		3.58968e-06	952.895	952.895
3.34929e-06	946.767	946.767		3.34929e-06	952.904	952.904
3.125e-06	946.839	946.839		3.125e-06	952.915	952.915
2.91573e-06	946.914	946.914		2.91573e-06	952.926	952.926
2.72047e-06	946.992	946.992		2.72047e-06	952.938	952.938
2.53829e-06	947.074	947.074		2.53829e-06	952.95	952.95
2.36831e-06	947.16	947.16		2.36831e-06	952.963	952.963
2.20971e-06	947.25	947.25		2.20971e-06	952.977	952.977
2.06173e-06	947.344	947.344		2.06173e-06	952.992	952.992
1.92366e-06	947.441	947.441		1.92366e-06	953.007	953.007
1.79484e-06	947.543	947.543		1.79484e-06	953.024	953.024
1.67465e-06	947.648	947.648		1.67465e-06	953.041	953.041
1.5625e-06	947.756	947.756		1.5625e-06	953.059	953.059
1.45786e-06	947.869	947.869		1.45786e-06	953.077	953.077
1.36024e-06	947.985	947.985		1.36024e-06	953.097	953.097
1.26914e-06	948.104	948.104		1.26914e-06	953.118	953.118
1.18415e-06	948.227	948.227		1.18415e-06	953.139	953.139
1.10485e-06	948.352	948.352		1.10485e-06	953.162	953.162
1.03087e-06	948.481	948.481		1.03087e-06	953.185	953.185
9.61831e-07	948.612	948.612		9.61831e-07	953.21	953.21
8.9742e-07	948.745	948.745		8.9742e-07	953.235	953.235
8.37323e-07	948.881	948.881		8.37323e-07	953.261	953.261
7.8125e-07	949.019	949.019		7.8125e-07	953.288	953.288
7.28932e-07	949.158	949.158		7.28932e-07	953.316	953.316
6.80117e-07	949.298	949.298		6.80117e-07	953.345	953.345
6.34572e-07	949.439	949.439		6.34572e-07	953.374	953.374
5.92077e-07	949.58	949.58		5.92077e-07	953.405	953.405
5.52427e-07	949.722	949.722		5.52427e-07	953.436	953.436
5.15433e-07	949.864	949.864		5.15433e-07	953.467	953.467
4.80916e-07	950.005	950.005		4.80916e-07	953.5	953.5
4.4871e-07	950.145	950.145		4.4871e-07	953.532	953.532
4.18661e-07	950.284	950.284		4.18661e-07	953.566	953.566
3.90625e-07	950.422	950.422		3.90625e-07	953.599	953.599
3.64466e-07	950.557	950.557		3.64466e-07	953.633	953.633
3.40059e-07	950.691	950.691		3.40059e-07	953.667	953.667
3.17286e-07	950.822	950.822		3.17286e-07	953.702	953.702
2.96038e-07	950.951	950.951		2.96038e-07	953.736	953.736
2.76214e-07	951.077	951.077		2.76214e-07	953.77	953.77
2.57716e-07	951.199	951.199		2.57716e-07	953.804	953.804
2.40458e-07	951.319	951.319		2.40458e-07	953.838	953.838
2.24355e-07	951.435	951.435		2.24355e-07	953.872	953.872
2.09331e-07	951.547	951.547		2.09331e-07	953.905	953.905
1.95312e-07	951.656	951.656		1.95312e-07	953.938	953.938
1.82233e-07	951.761	951.761		1.82233e-07	953.97	953.97
1.70029e-07	951.862	951.862		1.70029e-07	954.002	954.002
1.58643e-07	951.96	951.96		1.58643e-07	954.033	954.033
1.48019e-07	952.054	952.054		1.48019e-07	954.063	954.063
1.38107e-07	952.144	952.144		1.38107e-07	954.093	954.093
1.28858e-07	952.23	952.23		1.28858e-07	954.122	954.122
1.20229e-07	952.312	952.312		1.20229e-07	954.15	954.15
1.12178e-07	952.391	952.391		1.12178e-07	954.177	954.177
1.04665e-07	952.466	952.466		1.04665e-07	954.203	954.203
9.76562e-08	952.538	952.538		9.76562e-08	954.228	954.228
9.11165e-08	952.606	952.606		9.11165e-08	954.253	954.253
8.50147e-08	952.67	952.67		8.50147e-08	954.276	954.276
7.93215e-08	952.732	952.732		7.93215e-08	954.299	954.299
7.40096e-08	952.79	952.79		7.40096e-08	954.32	954.32
6.90534e-08	952.845	952.845		6.90534e-08	954.341	954.341
6.44291e-08	952.898	952.898		6.44291e-08	954.361	954.361
6.01145e-08	952.947	952.947		6.01145e-08	954.379	954.379
5.60888e-08	952.994	952.994		5.60888e-08	954.397	954.397
5.23327e-08	953.038	953.038		5.23327e-08	954.415	954.415
4.88281e-08	953.079	953.079		4.88281e-08	954.431	954.431
4.55582e-08	953.119	953.119		4.55582e-08	954.446	954.446
4.25073e-08	953.155	953.155		4.25073e-08	954.461	954.461
3.96607e-08	953.19	953.19		3.96607e-08	954.475	954.475
3.70048e-08	953.223	953.223		3.70048e-08	954.488	954.488
3.45267e-08	953.254	953.254		3.45267e-08	954.501	954.501
3.22145e-08	953.283	953.283		3.22145e-08	954.512	954.512
3.00572e-08	953.31	953.31		3.00572e-08	954.523	954.523
2.80444e-08	953.336	953.336		2.80444e-08	954.534	954.534
2.61663e-08	953.36	953.36		2.61663e-08	954.544	954.544
2.44141e-08	953.382	953.382		2.44141e-08	954.553	954.553
2.27791e-08	953.403	953.403		2.27791e-08	954.562	954.562
2.12537e-08	953.423	953.423		2.12537e-08	954.57	954.57
1.98304e-08	953.442	953.442		1.98304e-08	954.578	954.578
1.85024e-08	953.459	953.459		1.85024e-08	954.585	954.585
1.72633e-08	953.475	953.475		1.72633e-08	954.592	954.592
1.61073e-08	953.491	953.491		1.61073e-08	954.599	954.599
1.50286e-08	953.505	953.505		1.50286e-08	954.605	954.605
1.40222e-08	953.518	953.518		1.40222e-08	954.611	954.611
1.30832e-08	953.531	953.531		1.30832e-08	954.616	954.616
1.2207e-08	953.542	953.542		1.2207e-08	954.621	954.621
1.13896e-08	953.553	953.553		1.13896e-08	954.626	954.626
1.06268e-08	953.564	953.564		1.06268e-08	954.63	954.63
9.91519e-09	953.573	953.573		9.91519e-09	954.634	954.634
9.2512e-09	953.582	953.582		9.2512e-09	954.638	954.638
8.63167e-09	953.591	953.591		8.63167e-09	954.642	954.642
8.05363e-09	953.599	953.599		8.05363e-09	954.645	954.645
7.51431e-09	953.606	953.606		7.51431e-09	954.648	954.648
7.0111e-09	953.613	953.613		7.0111e-09	954.651	954.651
6.54158e-09	953.619	953.619		6.54158e-09	954.654	954.654
6.10351e-09	953.625	953.625		6.10351e-09	954.657	954.657
5.69478e-09	953.631	953.631		5.69478e-09	954.659	954.659
5.31342e-09	953.636	953.636		5.31342e-09	954.661	954.661
4.95759e-09	953.641	953.641		4.95759e-09	954.663	954.663
4.6256e-09	953.645	953.645		4.6256e-09	954.665	954.665
4.31584e-09	953.65	953.65		4.31584e-09	954.667	954.667
4.02682e-09	953.654	953.654		4.02682e-09	954.669	954.669
3.75715e-09	953.657	953.657		3.75715e-09	954.671	954.671
3.50555e-09	953.661	953.661		3.50555e-09	954.672	954.672
3.27079e-09	953.664	953.664		3.27079e-09	954.674	954.674
3.05176e-09	953.667	953.667		3.05176e-09	954.675	954.675
2.84739e-09	953.67	953.67		2.84739e-09	954.676	954.676
2.65671e-09	953.673	953.673		2.65671e-09	954.677	954.677
2.4788e-09	953.675	953.675		2.4788e-09	954.678	954.678
2.3128e-09	953.677	953.677		2.3128e-09	954.679	954.679
2.15792e-09	953.679	953.679		2.15792e-09	954.68	954.68
2.01341e-09	953.681	953.681		2.01341e-09	954.681	954.681
1.87858e-09	953.683	953.683		1.87858e-09	954.682	954.682
1.75277e-09	953.685	953.685		1.75277e-09	954.683	954.683
1.6354e-09	953.687	953.687		1.6354e-09	954.684	954.684
1.52588e-09	953.688	953.688		1.52588e-09	954.684	954.684
1.42369e-09	953.69	953.69		1.42369e-09	954.685	954.685
1.32835e-09	953.691	953.691		1.32835e-09	954.685	954.685
1.2394e-09	953.692	953.692		1.2394e-09	954.686	954.686
1.1564e-09	953.693	953.693		1.1564e-09	954.686	954.686
1.07896e-09	953.694	953.694		1.07896e-09	954.687	954.687
1.0067e-09	953.695	953.695		1.0067e-09	954.687	954.687
9.39288e-10	953.696	953.696		9.39288e-10	954.688	954.688
8.76387e-10	953.697	953.697		8.76387e-10	954.688	954.688
8.17698e-10	953.698	953.698		8.17698e-10	954.689	954.689
7.62939e-10	953.699	953.699		7.62939e-10	954.689	954.689
