# Supplementary material for: Identification of a third myosin-5a-melanophilin interaction that mediates the association of myosin-5a with melanosomes
Source: eLife journal article supplement (doi:10.7554/elife.93662), 2024-01-19
Supplement: fig5-data2 [file elife-Figure 5B data.xlsx]

## Sheet: Sheet1
Myo5a-MTD (µM)		0	2	4	8
Mlph-ABD gray value in 3 biological replicates		99084	77429	54099	45100
		95744	80847	59812	52753
		68048	57645	44918	39220
Fold change		1	0.781448	0.545991	0.455169
		1	0.844408	0.624708	0.55098
		1	0.847123	0.660093	0.576358
Bonferroni's multiple comparisons test	Mean Diff.	95.00% CI of diff.	Significant?	Summary	Adjusted P Value
0 vs. 2	0.1757	0.05967 to 0.2917	Yes	**	0.0055
0 vs. 4	0.3897	0.2737 to 0.5057	Yes	****	<0.0001
0 vs. 8	0.4725	0.3565 to 0.5885	Yes	****	<0.0001
