# Supplementary material for: Identification of a third myosin-5a-melanophilin interaction that mediates the association of myosin-5a with melanosomes
Source: eLife journal article supplement (doi:10.7554/elife.93662), 2024-01-19
Supplement: fig6-data1 [file elife Figure 6B data.xlsx]

## Sheet: Sheet1
EGFP				Mlph ΔABD				Mlph ΔABD E449A				Mlph ΔABD E452A
EGFP-expressing cell numbers	dilute-like phenotype cell numbers	Percentage	Percentage (%)	EGFP-expressing cell numbers	dilute-like phenotype cell numbers	Percentage	Percentage (%)	EGFP-expressing cell numbers	dilute-like phenotype cell numbers	Percentage	Percentage (%)	EGFP-expressing cell numbers	dilute-like phenotype cell numbers	Percentage	Percentage (%)
18	1	0.0555556	5.55556	13	7	0.538462	53.8462	6	1	0.166667	16.6667	12	2	0.166667	16.6667
22	0	0	0	10	5	0.5	50	16	4	0.25	25	10	2	0.2	20
15	1	0.0666667	6.66667	12	4	0.333333	33.3333	11	3	0.272727	27.2727	23	4	0.173913	17.3913
12	1	0.0833333	8.33333	10	5	0.5	50	8	1	0.125	12.5	16	4	0.25	25
10	0	0	0	11	5	0.454545	45.4545	6	1	0.166667	16.6667	11	1	0.0909091	9.09091
12	0	0	0	10	6	0.6	60	11	3	0.272727	27.2727	16	2	0.125	12.5
12	1	0.0833333	8.33333	9	4	0.444444	44.4444	12	3	0.25	25	13	2	0.153846	15.3846
15	0	0	0	9	5	0.555556	55.5556	9	1	0.111111	11.1111	16	4	0.25	25
22	2	0.0909091	9.09091	8	4	0.5	50	14	1	0.0714286	7.14286	20	4	0.2	20
16	1	0.0625	6.25	9	4	0.444444	44.4444	8	1	0.125	12.5	18	4	0.222222	22.2222
15	1	0.0666667	6.66667	10	4	0.4	40	14	2	0.142857	14.2857	16	2	0.125	12.5
16	1	0.0625	6.25	6	3	0.5	50	11	3	0.272727	27.2727	17	1	0.0588235	5.88235
9	0	0	0	11	4	0.363636	36.3636	20	4	0.2	20	16	1	0.0625	6.25
13	0	0	0	8	5	0.625	62.5	10	2	0.2	20	18	2	0.111111	11.1111
13	1	0.0769231	7.69231	10	6	0.6	60	22	5	0.227273	22.7273	8	3	0.375	37.5
20	1	0.05	5	11	6	0.545455	54.5455	11	3	0.272727	27.2727	15	4	0.266667	26.6667
16	1	0.0625	6.25	8	5	0.625	62.5	8	3	0.375	37.5	9	3	0.333333	33.3333
19	1	0.0526316	5.26316	5	2	0.4	40	11	3	0.272727	27.2727	13	3	0.230769	23.0769
				13	6	0.461538	46.1538
				11	4	0.363636	36.3636
total 275				total 194				total 208				total 267
	EGFP	mlph ΔABD	mlph ΔABD e449a	mlph ΔABD e452a
Number of values	18	20	18	18
Minimum	0	33.33	7.143	5.882
25% Percentile	0	41.11	13.84	12.15
Median	5.903	50	21.36	18.7
75% Percentile	6.923	55.3	27.27	25
Maximum	9.091	62.5	37.5	37.5
Mean	4.52	48.78	20.97	19.07
Std. Deviation	3.453	8.872	7.757	8.493
Std. Error of Mean	0.8138	1.984	1.828	2.002
Lower 95% CI of mean	2.803	44.62	17.11	14.85
Upper 95% CI of mean	6.237	52.93	24.83	23.3
Sum	81.35	975.5	377.5	343.3
Bonferroni's multiple comparisons test	Mean Diff.	95.00% CI of diff.	Significant?	Summary	Adjusted P Value
EGFP vs. mlph ΔABD	-44.26	-50.88 to -37.63	Yes	****	<0.0001
EGFP vs. mlph ΔABD e449a	-16.45	-23.25 to -9.654	Yes	****	<0.0001
EGFP vs. mlph ΔABD e452a	-14.56	-21.35 to -7.758	Yes	****	<0.0001
mlph ΔABD vs. mlph ΔABD e449a	27.81	21.18 to 34.43	Yes	****	<0.0001
mlph ΔABD vs. mlph ΔABD e452a	29.7	23.08 to 36.33	Yes	****	<0.0001
mlph ΔABD e449a vs. mlph ΔABD e452a	1.895	-4.901 to 8.692	No	ns	>0.9999
