# Supplementary material for: Identification of a third myosin-5a-melanophilin interaction that mediates the association of myosin-5a with melanosomes
Source: eLife journal article supplement (doi:10.7554/elife.93662), 2024-01-19
Supplement: fig7-data1 [file elife Figure 7C data.xlsx]

## Sheet: Sheet1
EGFP				Myo5a-Tail				Myo5a-Tail ΔG
EGFP-expressing cell numbers	dilute-like phenotype cell numbers	Percentage	Percentage (%)	EGFP-expressing cell numbers	dilute-like phenotype cell numbers	Percentage	Percentage (%)	EGFP-expressing cell numbers	dilute-like phenotype cell numbers	Percentage	Percentage (%)
45	1	0.0222222	2.22222	13	6	0.461538	46.1538	12	1	0.0833333	8.33333
23	0	0	0	14	4	0.285714	28.5714	13	2	0.153846	15.3846
28	1	0.0357143	3.57143	17	8	0.470588	47.0588	17	2	0.117647	11.7647
31	0	0	0	10	3	0.3	30	12	1	0.0833333	8.33333
23	1	0.0434783	4.34783	18	6	0.333333	33.3333	12	0	0	0
21	0	0	0	20	8	0.4	40	10	2	0.2	20
11	0	0	0	23	7	0.304348	30.4348	11	1	0.0909091	9.09091
18	0	0	0	13	7	0.538462	53.8462	9	0	0	0
10	1	0.1	10	15	7	0.466667	46.6667	8	0	0	0
7	0	0	0	12	5	0.416667	41.6667	12	2	0.166667	16.6667
14	0	0	0	14	5	0.357143	35.7143	9	0	0	0
17	1	0.0588235	5.88235	14	9	0.642857	64.2857	10	1	0.1	10
22	1	0.0454545	4.54545	12	4	0.333333	33.3333	11	1	0.0909091	9.09091
18	0	0	0	14	7	0.5	50	12	1	0.0833333	8.33333
18	1	0.0555556	5.55556	5	2	0.4	40	7	0	0	0
22	0	0	0	6	3	0.5	50	9	0	0	0
15	1	0.0666667	6.66667	6	4	0.666667	66.6667	6	0	0	0
12	1	0.0833333	8.33333	7	4	0.571429	57.1429	14	1	0.0714286	7.14286
total 335				total 233				total 194
	EGFP	Myo5a-Tail	Myo5a-TailΔG
Number of values	18	18	18
Minimum	0	28.57	0
Maximum	10	66.67	20
Range	10	38.1	20
Mean	2.84	44.16	6.897
Std. Deviation	3.355	11.48	6.514
Std. Error of Mean	0.7909	2.705	1.535
Bonferroni's multiple comparisons test	Mean Diff.	95.00% CI of diff.	Significant?	Summary	Adjusted P Value
EGFP vs. Myo5a-Tail	-41.32	-47.81 to -34.83	Yes	****	<0.0001
EGFP vs. Myo5a-TailΔG	-4.056	-10.54 to 2.431	No	ns	0.3835
Myo5a-Tail vs. Myo5a-TailΔG	37.26	30.78 to 43.75	Yes	****	<0.0001
