# Supplementary material for: Identification of a third myosin-5a-melanophilin interaction that mediates the association of myosin-5a with melanosomes
Source: eLife. 2024 Jun 20;13:RP93662. doi: 10.7554/eLife.93662 (PMC11189624; doi:10.7554/eLife.93662)
Supplement: Supplementary file 1. [file elife-93662-supp1.xlsx]

## Sheet: Sheet1
	Supplementary file 1. The primer sequences used in PCR for Myo5a constructs in pET30HFa
	Primer name	Primer sequences (5’–3’)
	Myo5a-1106-F	CCCTGGCTGATATCGGATCCGAATTCCCTAAGCCAGGACACAAGAG
	Myo5a-1410-R	TGGTGCTCGAGTGCGGCCGCAAGCTTTCACAGGTTTTCATTGGTCAG
	Myo5a-1193-F	CCTGGCTGATATCGGATCCGAATTCAGGCCACAGATAAGAGGAG
	Myo5a-1453-R	GTGCTCGAGTGCGGCCGCAAGCTTTCATTTCTTCAGTTTCCGGAC
	Myo5a-1167-R	TGGTGCTCGAGTGCGGCCGCAAGCTTTCACACTTCTAGTTCACCA
	Myo5a-Trx-1345-F	GACGCTAACCTGGGCTGCAGCTCTTAGAATCCCAGCTAC
	Myo5a-Trx-1411-F	GACGCTAACCTGGCGCTGCAGTATTTTGAGGAATTATATG
	Myo5a-Trx-1436-F	GACGCTAACCTGGCGCTGCAGCTGATGGAACAACTTGAAAAGCAG
	Myo5a-Trx-1467-R	CTCGAGTGCGGCCGCAAGCTTTCACACTTCTAGTTCACCAATTTTTTT
	Myo5a-MTD-K1456A-F	CTGAAGAAACAACTGGCAGTCTTTGCC
	Myo5a-MTD-K1456A-R	GCCAGTTGTTTCTTCAGTTTCCGGACA
	Myo5a-MTD-K1460A-F	CTGAAAGTCTTTGCCGCAAAAATTGGT
	Myo5a-MTD-K1460A-R	GCGGCAAAGACTTTCAGTTGTTTCTTC
	Myo5a-MTD-ΔF-F1	CCCTGGCTGATATCGGATCCGAATTCCCTAAGCCAGGACACAAGAG
	Myo5a-MTD-ΔF-R1	CCATCAGATCCAGGTTTTCATTGGTCAGCC
	Myo5a-MTD-ΔF-F2	TGAAAACCTGGATCTGATGGAACAACTTGA
	Myo5a-MTD-ΔF-R2	TGGTGCTCGAGTGCGGCCGCAAGCTTTCACACTTCTAGTTCACCA
	Myo5a-MTD-ΔG-F	CCCTGGCTGATATCGGATCCGAATTCCCTAAGCCAGGACACAAGAG
	Myo5a-MTD-ΔG-R	CTCGAGTGCGGCCGCAAGCTTTCATTTCTTCAGTTTCCG
	F: forward strand; R: reverse strand.
