# Supplementary material for: Identification of a third myosin-5a-melanophilin interaction that mediates the association of myosin-5a with melanosomes
Source: eLife. 2024 Jun 20;13:RP93662. doi: 10.7554/eLife.93662 (PMC11189624; doi:10.7554/eLife.93662)
Supplement: Supplementary file 2. [file elife-93662-supp2.xlsx]

## Sheet: Sheet1
	Supplementary file 2. The primer sequences used in PCR for Mlph constructs in pGEX4T1
	Primer name	Primer sequences (5’–3’)
	Mlph-401-F	GATCTGGTTCCGCGTGGATCCTCATCAGAAGATGAGACCAAG
	Mlph-431-F	GATCTGGTTCCGCGTGGATCCAGGAACCCTCGGAGCCCT
	Mlph-437-F	GATCTGGTTCCGCGTGGATCCGGGAACCCTGCTCGGCCT
	Mlph-446-F	GATCTGGTTCCGCGTGGATCCACAGATGAGGAGCTCTCTGA
	Mlph-455-F	GATCTGGTTCCGCGTGGATCCGATAGAGTGGCCATGACAGC
	Mlph-525-R	GTCACGATGCGGCCGCTCGAGTTATTGGTCATCAGGGTCTG
	Mlph-560-R	GTCACGATGCGGCCGCTCGAGTTACACTGATTTCCGATCAA
	Mlph-571-R	GTCACGATGCGGCCGCTCGAGTTAGTTAGGGTTCCTTTGT
	Mlph-578-R	GTCACGATGCGGCCGCTCGAGTTATCTGGCTGTCCCTCTC
	Mlph-590-R	GTCACGATGCGGCCGCTCGAGTTAGGGCTGCTGGGCCAT
	Mlph-ABD-D447A-F	CTACAAAAAGCACAGCTGAGGAGCTC
	Mlph-ABD-D447A-R	GCTGTGCTTTTTGTAGGCCGAGCAGG
	Mlph-ABD-E449A-F	AAAGCACAGATGAGGCGCTCTCTGAG
	Mlph-ABD-E449A-R	GCCTCATCTGTGCTTTTTGTAGGCCG
	Mlph-ABD-E452A-F	ATGAGGAGCTCTCTGCGATGGAGGAT
	Mlph-ABD-E452A-R	GCAGAGAGCTCCTCATCTGTGCTTTT
	Mlph-ABD-E454A-F	AGCTCTCTGAGATGGCGGATAGAGTG
	Mlph-ABD-E454A-R	GCCATCTCAGAGAGCTCCTCATCTGT
	Mlph-ABD-R562A-F	CGGAAATCAGTGTACGCTGGCTCGCTG
	Mlph-ABD-R562A-R	GCGTACACTGATTTCCGATCAAAAGAA
	Mlph-ABD-R568A-F	GGCTCGCTGACACAAGCGAACCCTAAC
	Mlph-ABD-R568A-R	GCTTGTGTCAGCGAGCCACGGTACACT
	Mlph-EFBD-F	GATCTGGTTCCGCGTGGATCCGAGGGCCTAGAGGAGACTGGTG
	Mlph-EFBD-R	GTCACGATGCGGCCGCTCGAGCTCATCTTCTGATGAGGTGCTGG
	F: forward strand; R: reverse strand.
