# Supplementary material for: Identification of a third myosin-5a-melanophilin interaction that mediates the association of myosin-5a with melanosomes
Source: eLife. 2024 Jun 20;13:RP93662. doi: 10.7554/eLife.93662 (PMC11189624; doi:10.7554/eLife.93662)
Supplement: Supplementary file 3. [file elife-93662-supp3.xlsx]

## Sheet: Sheet1
	Supplementary file 3. The primer sequences used in PCR for Myo5a or Mlph constructs in pEGFP-C1
	Primer name	Primer sequences (5’–3’)
	MlphΔABD-F	GTCCGGACTCAGATCTCGAGCAGGTGGAGGTGGATCTGAGC
	MlphΔABD-R	GTACCGTCGACTGCAGAATTCTTAGGGCTGCTGGGCCATCA
	MlphΔABD-E449A-F	AAAGCACAGATGAGGCGCTCTCTGAG
	MlphΔABD-E449A-R	GCCTCATCTGTGCTTTTTGTAGGCCG
	MlphΔABD-E452A-F	ATGAGGAGCTCTCTGCGATGGAGGAT
	MlphΔABD-E452A-R	GCAGAGAGCTCCTCATCTGTGCTTTT
	Myo5a-Tail-F	AGTCCGGACTCAGATCTCGAGCCTAAGCCAGGACACAAGAGAAC
	Myo5a-Tail-R	GTACCGTCGACTGCAGAATTCGACCCGTGCGATGAAGCC
	Myo5a-MTD-F	TCCGGACTCAGATCTCGAGCACCTAAGCCAGGACACAAGA
	Myo5a-MTD-R	GTACCGTCGACTGCAGAATTCTCACACTTCTAGTTCACCAATT
	Myo5a-MTDΔG-F	TCCGGACTCAGATCTCGAGCACCTAAGCCAGGACACAAGA
	Myo5a-MTDΔG-R	GTACCGTCGACTGCAGAATTCTCATTTCTTCAGTTTCCGGACAG
	Myo5a-TailΔG-F1	AGTCCGGACTCAGATCTCGAGCCTAAGCCAGGACACAAGAGAAC
	Myo5a-TailΔG-R1	CCATCTGCCCTTTCTTCAGTTTCCGGACAG
	Myo5a-TailΔG-F2	ACTGAAGAAAGGGCAGATGGAGAACATATC
	Myo5a-TailΔG-R2	GTACCGTCGACTGCAGAATTCTCAGACCCGTGCGATGAAGCCCA
	F: forward strand; R: reverse strand.
